# Supplementary material for: Centrobin controls primary ciliogenesis in vertebrates
Source: PubMed Central journal article supplement — J Cell Biol. 2018 Apr 2;217(4):1205–15. doi: 10.1083/jcb.201706095 (PMC5881496; doi:10.1083/jcb.201706095), 2018-04-02
Supplement: JCB_201706095_sm.pdf [file JCB_201706095_sm.pdf]

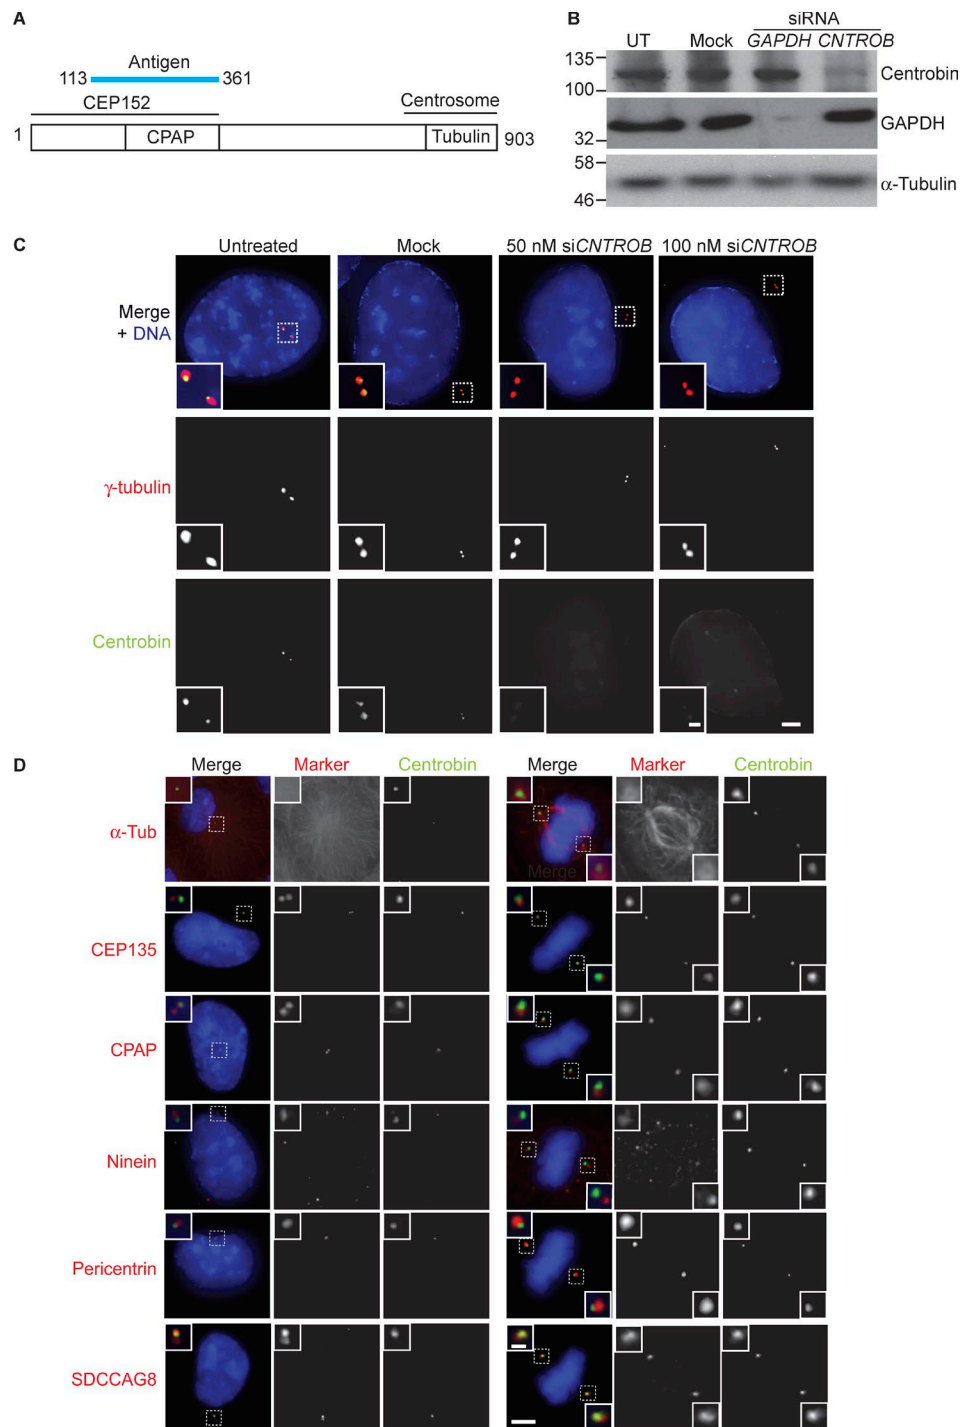

Figure S1. **Generation and characterization of a monoclonal antibody for centrin.** (A) Diagram of centrin indicating fragment of the protein used for generation of the monoclonal 6D4F4 and the regions required for CPAP, CEP152, or tubulin interactions or localization to the centrosome. (B) RNAi confirmation of the specificity of 6D4F4 using immunoblot analysis of control hTERT-RPE1 cells or *CNTROB* knockdown cells 48 h after siRNA transfection with the indicated siRNA. UT, untreated. (C) Micrograph confirmation of the specificity of 6D4F4. *CNTROB* knockdown or control hTERT-RPE1 cells were stained for centrin (green) and  $\gamma$ -tubulin (red) 48 h after siRNA transfection. Bars: 5  $\mu$ m; (inset) 1  $\mu$ m. (D) IF localization of centrin. Interphase or mitotic cells were stained with the monoclonal antibody 6D4F4 to centrin (green) and the indicated markers (red). Bars: 5  $\mu$ m; (inset) 1  $\mu$ m.

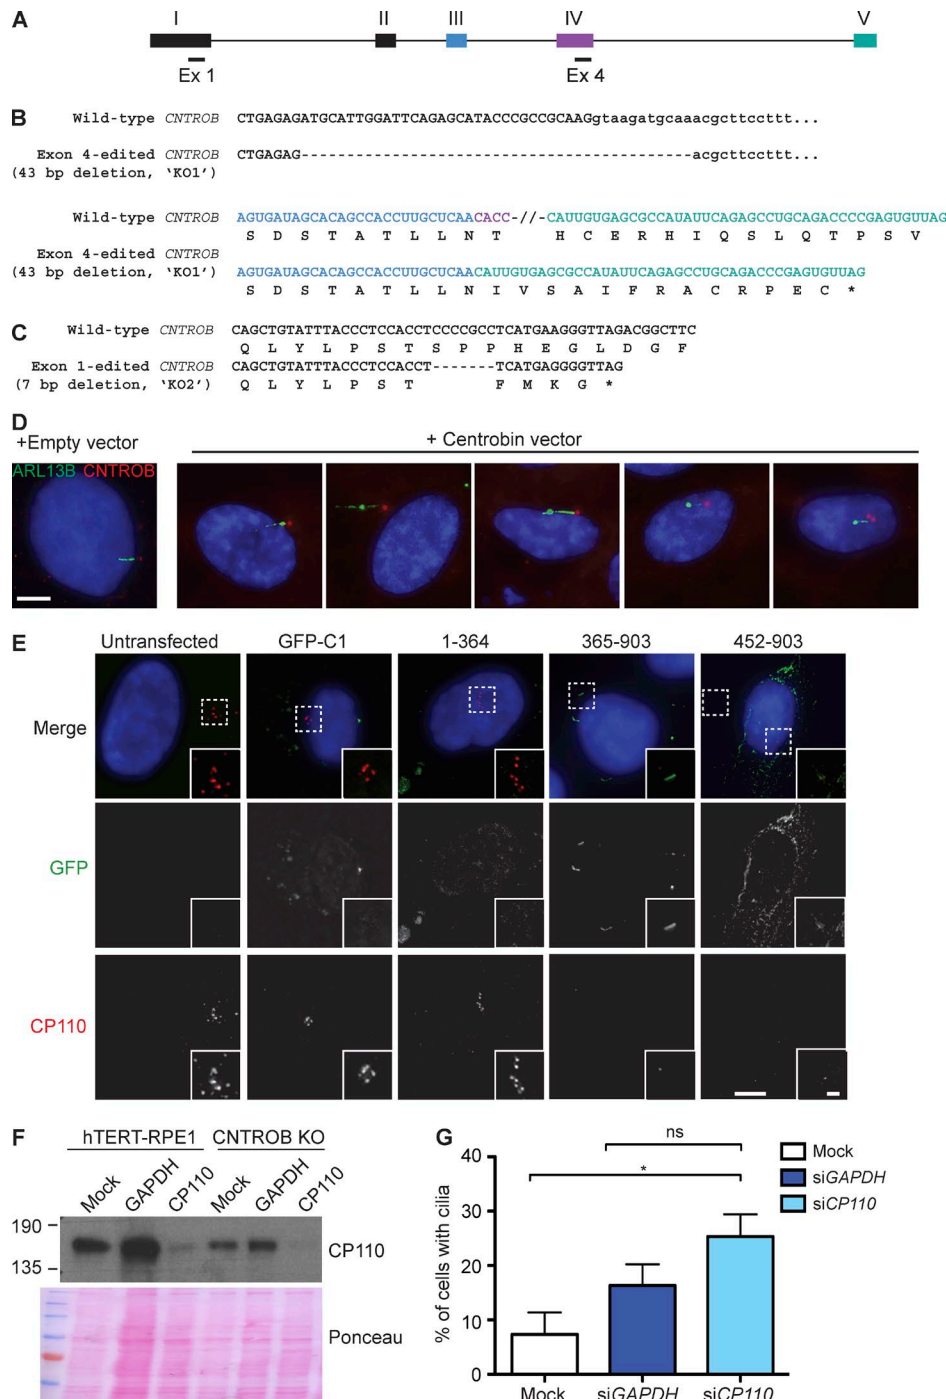

**Figure S2. Confirmation of *CNTROB* disruption by genome editing.** (A) Diagram of exons 1–5 of the 19 exons in the *CNTROB* locus showing the location of the guide RNAs used for CRISPR-directed genome editing (Ex 1 and Ex 4; not to scale). Exons are based on sequence NM\_053051.3 and are indicated in color to clarify splicing in B. (B) Genome editing of *CNTROB* genomic sequence with the resultant transcript and predicted protein sequence for KO1 (exon 4 guide). Sequences are colored according to their respective exon as in A, and part of the WT exon 4 sequence is omitted. The 43-bp deletion at the 3' end of exon 4 in KO1 led to splicing between directly exons 3 and 5, as indicated. (C) Genome editing of *CNTROB* genomic sequence with the resultant transcript and predicted protein sequence for KO2 (exon 1 guide). (D) IF micrographs of cells 48 h after transfection with the indicated plasmid. Cells were fixed and stained with antibodies to centrobilin (red) and ARL13B (green), then counterstained for DNA with DAPI (blue). 35% of 100 cells transfected with the centrobilin plasmid showed the "bulge," which was seen in only 4% of the control transfectants. Bar, 5  $\mu$ m. (E) IF micrographs of *CNTROB* null cells after 24 h serum starvation imposed 16 h after transfection with the indicated GFP control or GFP-tagged centrobilin fragment. Cells were fixed and stained with antibodies to CP110 (red) and GFP (green), then counterstained for DNA with DAPI (blue). Bars: 5  $\mu$ m; (inset) 1  $\mu$ m. Images are representative of two experiments in which CP110 accumulation was seen in a mean 65% of *CNTROB* knockout cells; 59% of the GFP-transfected cells; 65% of cells transfected with 1–364; 25% with 365–903; and 22% with 452–903. (F) Immunoblot showing the knockdown of CP110 in cells treated as indicated. Ponceau staining of the membrane after transfer was used as a loading control. (G) Bar chart shows quantitation of the ciliation frequency in *CNTROB* null cells after 48 h serum starvation with mock transfection, CP110 knockdown and control *GAPDH* knockdown. Histogram shows mean + SEM of three independent experiments in which at least 100 cells were quantitated for ciliation by staining for acetylated tubulin. \*,  $P < 0.05$ , in comparison to the indicated samples by unpaired  $t$  test.

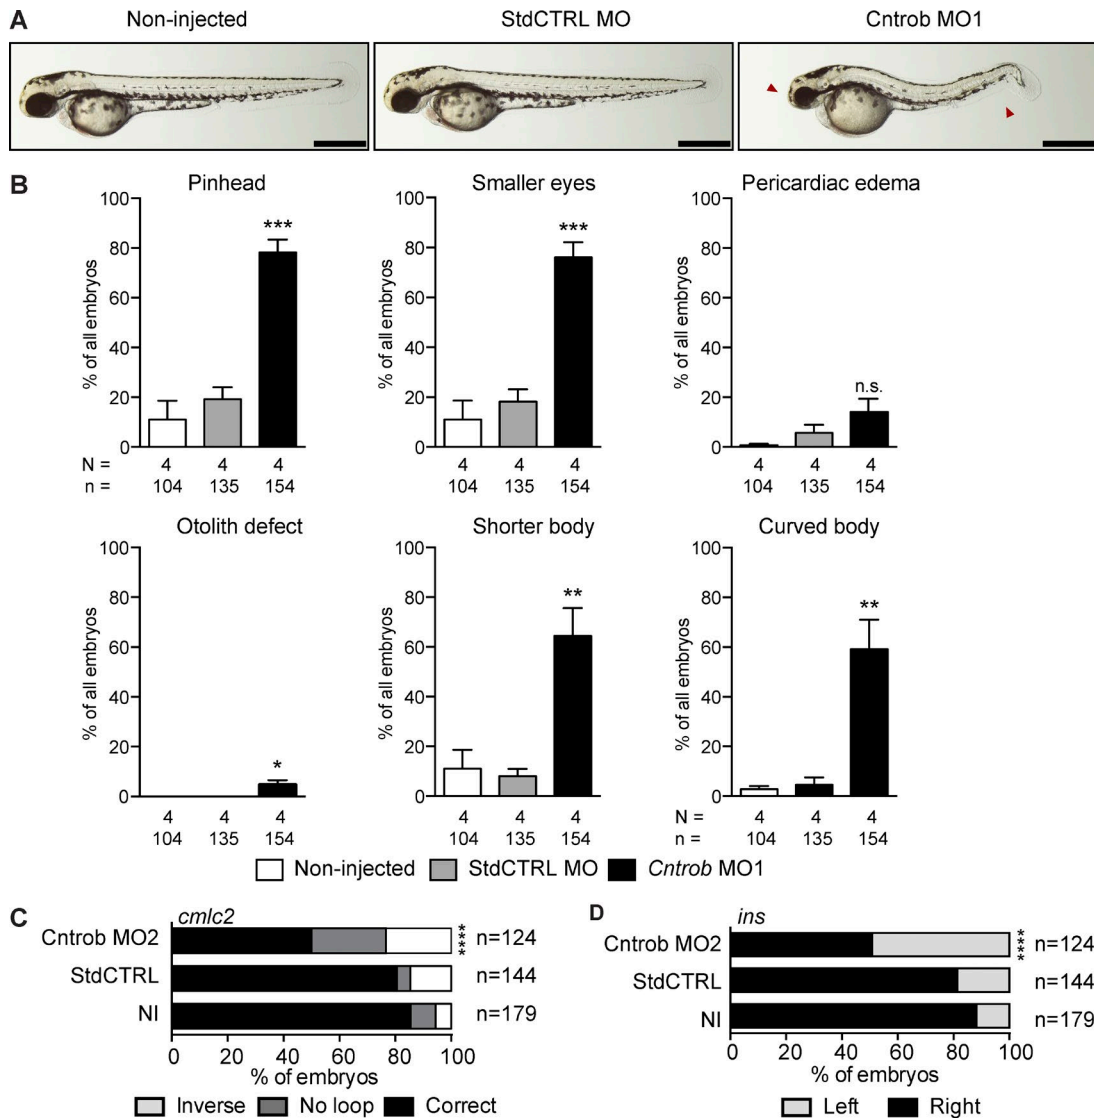

Figure S3. **Reproduction of the zebrafish phenotypes with a second MO.** MO1 was directed to the *centrobin* ATG and MO2 to the 5' UTR. **(A)** Live images show gross phenotypes of zebrafish embryos injected with control or *centrobin* MOs at 48 hpf. Arrowheads indicate morphological abnormalities. Bars, 500 nm. **(B)** Quantitation of developmental phenotypes in *centrobin*-deficient embryos. Each phenotype was quantitated over three experiments in the indicated number of zebrafish embryos, and graphs indicate means + SEM. \*,  $P < 0.05$ ; \*\*,  $P < 0.01$ ; \*\*\*\*,  $P < 0.0001$ , by one-way ANOVA. **(C)** Quantitation of appropriate heart looping in WT embryos and embryos injected as indicated at 48 hpf. \*\*\*\*,  $P < 0.0001$ . Significances were assessed using Fisher's exact test. **(D)** Quantitation of pancreas placement in WT embryos and embryos injected as indicated at 48 hpf. Correct placement is at right. \*\*\*\*,  $P < 0.0001$ . Significances were assessed using Fisher's exact test.
